# Supplementary material
Source: PubMed Central journal article supplement (PMC3190790)
Supplement: supp_M111.262030_jbc.M111.262030-1.pdf [file supp_M111.262030_jbc.M111.262030-1.pdf]

**Table S1. List of primers used in this study**

|                   | <b>Forward</b>                                                               | <b>Reverse</b>                                                                |
|-------------------|------------------------------------------------------------------------------|-------------------------------------------------------------------------------|
| <b>q-PCR</b>      |                                                                              |                                                                               |
| Nucleolin         | 5'-ACTGACCGGGAAACTGGGTC-3'                                                   | 5'-TGGCCCAGTCCAAGGTAAGT-3'                                                    |
| GAPDH             | 5'-GATTCCACCCATGGCAAATTC-3'                                                  | 5'-AGCATCGCCCCACTTGATT-3'                                                     |
| E2F2              | 5'-ACAAGGCCAACAAGAGGCTG-3'                                                   | 5'-TCAGTCCTGTTCGGGCACTTC-3'                                                   |
| c-myc             | 5'-CAGTGGGCTGTGAGGAGGTT-3'                                                   | 5'-CAGGCTCCTGGCAAAGGT-3'                                                      |
| miR-185-3p        | 5'-ACACTCCAGCTGGGTGGAGAGAAAGGCAGT-3'                                         | 5'-ACTGACTGATGCAATCTCAACTGGTGTCTGGA-3'                                        |
| <b>ChIP-PCR</b>   |                                                                              |                                                                               |
| 5s rDNA           | 5'-ACGGCCATACCACCCTGAA-3'                                                    | 5'-GCCAAAGAAAAAGCCTACAGCA-3'                                                  |
| miR-185           | 5'-CCCCTCCAGGCTCACCTT-3'                                                     | 5'-TGTGTGCTCTGCAGCTGTGAT-3'                                                   |
| miR-185 ct        | 5'-TGAGCCTCACGACGCACAT-3'                                                    | 5'-TGGAGCACATAGGGACTTGGT-3'                                                   |
| <b>Constructs</b> |                                                                              |                                                                               |
| pGL3-miR-185      | 5'-CGGGGTACCACTTATACTACCCAGTCATTAAGAC-3'                                     | 5'-CCGCTCGAGACAGCCCAGAAGCATCTGAACATCT-3'                                      |
| pGL-miR-185 CT    | 5'-CGGGGTACCGCACTTGCTGACATTTGGGGGTACA-3'                                     | 5'-CCGCTCGAGAGGGCAAGAACC CAAGAGTCACTTG-3'                                     |
| pSIF-miR-185-3p   | 5'-GATCCGATTGGAGAGAAAGGCAGTTCCTGATGGTCCCCTCCCCAGGGGCTGGCTTTCCTCTGGTCTTTTG-3' | 5'-AATTCAAAAAGACCAGAGGAAAGCCAGCCCCTGGGGAGGGGACCATCAGGAACTGCCTTCTCTCCAA TCG-3' |
| pSIF-miR-185-3pΔ  | 5'-GATCCGATTGGAGAGAAAGCGTCTTCCTGATGGTCCCCTCCCCAGGCCGAGGCTTTCCTCTGGTCTTTTG3'  | 5'-AATTCAAAAAGACCAGAGGAAAGCCTCGGCCTGGGGAGGGGACCATCAGGAAGACGCTTCTCTCCAA TCG-3' |
| pMIR-c-Myc        | 5'-CTAGTCTGCAGAGACAGATCA GCAACAACCGAAAATGCACCAG CCCAGGTCCTCGGACACCGAGA-3'    | 5'-AGCTTCTCGGTGTCCGAGGACCTGGGGCTGGTGCATTTTCGGTTGT TGCTGATCTGTCTATGCAGA-3'     |
| pMIR-c-MycΔ       | 5'-CTAGTCTGCAGAGACAGATCA GCAACATGGGATAATGCAGGTC GGGGAGGTCCTCGGACACCGAG A-3'  | 5'-AGCTTCTCGGTGTCCGAGGACCTCCCCGACCTGCATTATCCCATGT TGCTGATCTGTCTATGCAGA-3'     |

**Figure S1. miRNA array expression data from RNA samples 1 and 2.** Red denotes high expression and green denotes low expression relative to the median. Only the representative miRNA nodes that were significantly changed between samples 1 and 2 as indicated in Fig. 1A are shown here.

**Figure S2. Exogenous and endogenous c-Myc binds to the miR-185 and 5S rDNA promoter, but not a control DNA location.** The same CHIP experiments as those described in Figures 2C (exogenous v5-c-Myc in 293 cells) and 2E (endogenous c-Myc in U2OS cells), except the PCR products, were analyzed on an agarose gel. Primers were listed in Table S1.

**Figure S3. miR-185-3p affects both of the endogenous and exogenous c-Myc while miR-24 only affects the endogenous c-Myc with 3'UTR.** H1299 cells were transfected with indicated plasmids. Twenty hrs after transfection, cells were treated with serum-free medium and stimulated by 20 % FBS, cells were collected 3 hrs after stimulation. Immunoblot (IB) analysis was performed with the N262 anti-c-Myc antibody.

**Figure S4. miR-185-3p expression is correlated with c-Myc levels in different human cancer cell lines. Various cancer cells as indicated were harvested at the confluence of ~80% for quantitative real-time PCR (QRT-PCR) and IB assays.**

**Figure S5. miR-185-3p plays a little role in regulating c-Myc level in response to DNA damage treatment.** HCT116 cells were transfected with indicated plasmids and treated with or without 0.3  $\mu$ M doxorubicin (Dox). IB analysis was performed with the indicated antibodies.

**Figure S6. The transactivational activity of exogenous c-Myc is reduced in cultured cells.** H1299 cells were infected with ad-c-Myc. Cells were harvested at indicated time points post infection for QRT-PCR assays of the E2F2 mRNA level and for IB analysis of the exogenous c-Myc protein level.

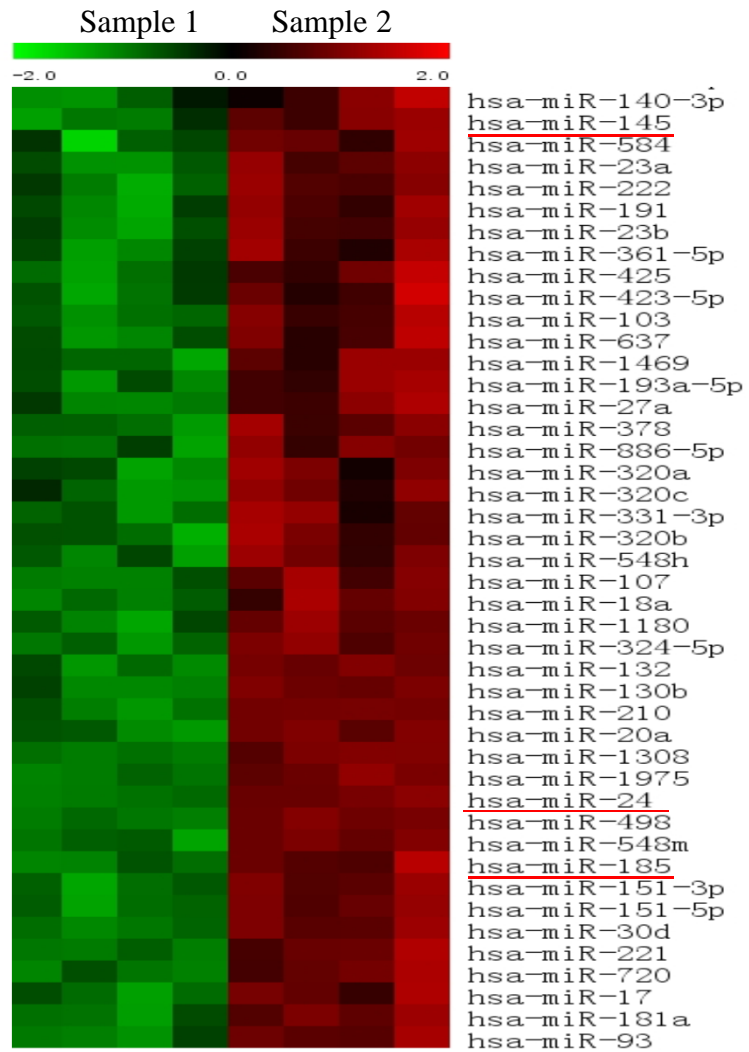

Fig. S1

**A**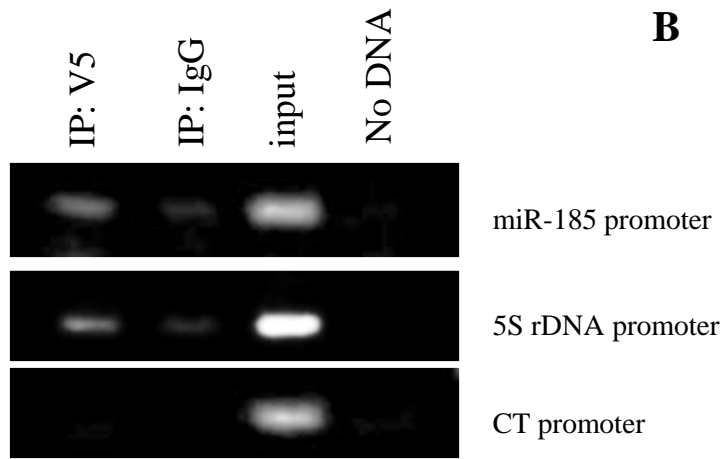**B**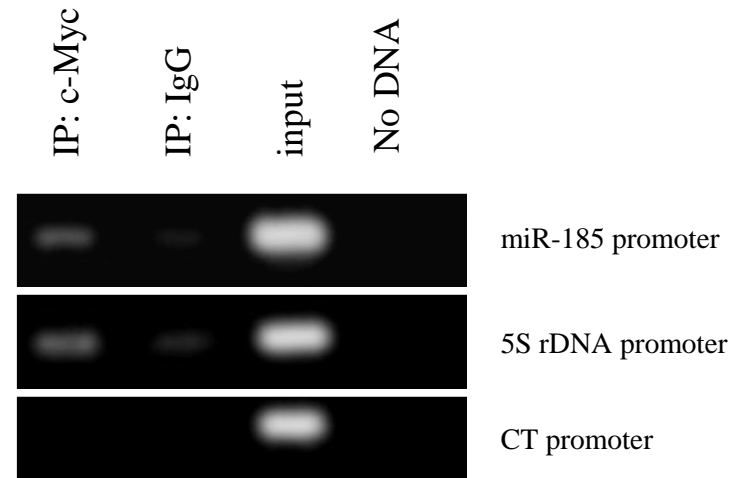

Fig. S2

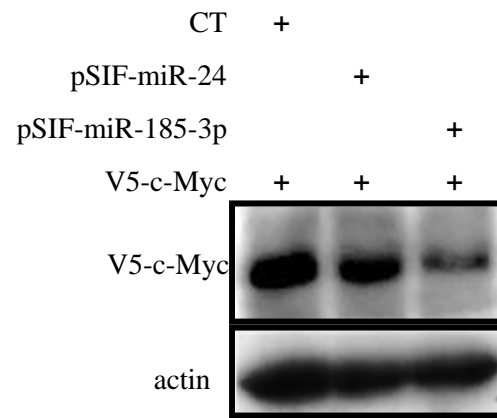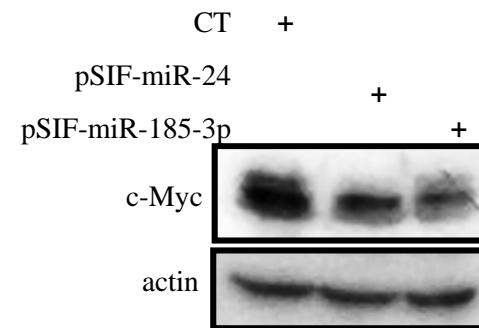

Fig. S3

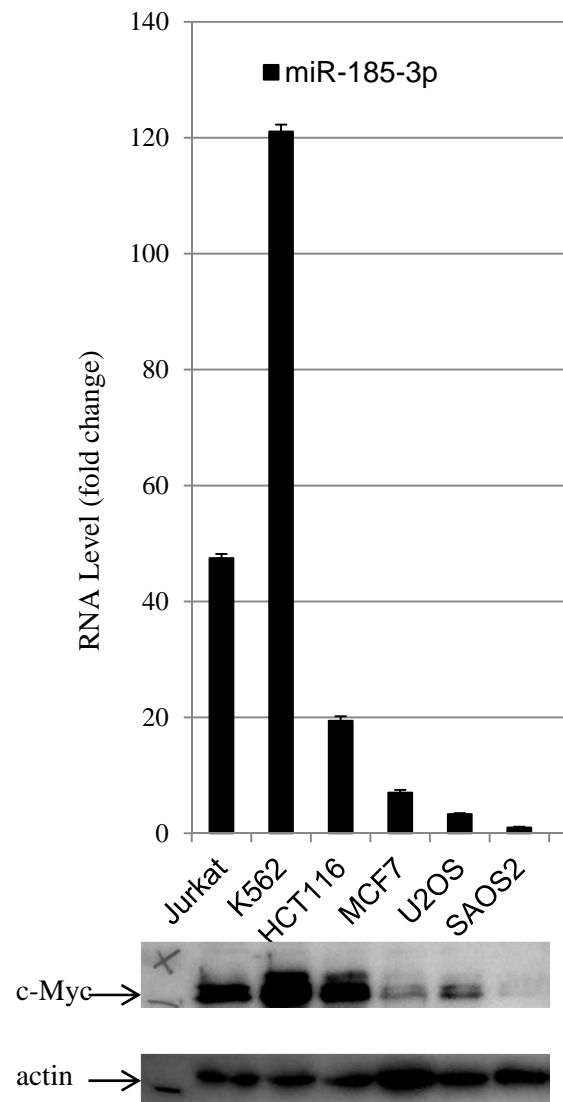

Fig. S4

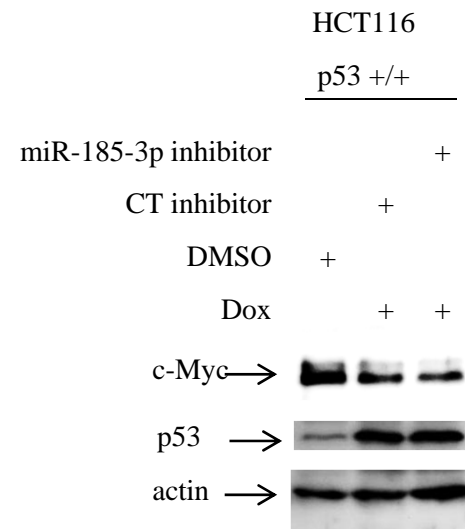

Fig. S5



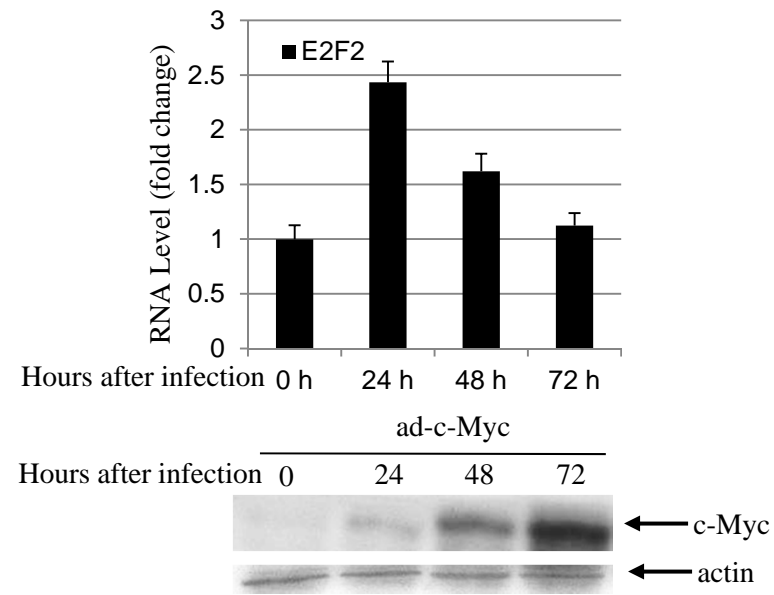

Fig. S6
